# Supplementary material
Source: MDPI journal article supplement (https://www.mdpi.com/1999-4907/14/2/418)
Supplement: s1 [file s1]

**Table S1.** The meteorological stations we collected before 1900. The detailed information includes latitude, longitude, observation elements, start and end year. The WMO station number is recorded after the station name (abbreviations).

| Station name         | Latitude | Longitude | Observation<br>Elements | Start Year | End Year |
|----------------------|----------|-----------|-------------------------|------------|----------|
| SWE00100026          | 63.18    | 14.48     | TMIN                    | 1882       | 2022     |
| CA002100398          | 64.07    | -139.33   | TMAX                    | 1898       | 1901     |
| CA002100400          | 64.05    | -139.43   | TMAX                    | 1897       | 1979     |
| CA002100635          | 69.50    | -139.25   | TMAX                    | 1896       | 1918     |
| CA002100880          | 62.82    | -137.37   | TMAX                    | 1898       | 2017     |
| GLE00100981          | 69.22    | -51.05    | TMIN                    | 1873       | 1960     |
| CA002101290          | 60.72    | -135.05   | TMAX                    | 1900       | 1960     |
| CA002201600          | 67.43    | -134.88   | TMAX                    | 1892       | 1977     |
| USC00501977          | 65.83    | -144.07   | TMIN                    | 1900       | 1999     |
| SWM00002080          | 68.44    | 22.45     | TMIN                    | 1882       | 2012     |
| CA002202100          | 61.87    | -121.35   | TMAX                    | 1895       | 1963     |
| FORT_SIMPSON2202102  | 61.77    | -121.23   |                         | 1895       | 2021     |
| SW000002120          | 66.96    | 17.73     | TMIN                    | 1887       | 2013     |
| SW000002196          | 65.83    | 24.14     | TMIN                    | 1882       | 2013     |
| SW000002361          | 62.63    | 17.93     | TMIN                    | 1882       | 2022     |
| CA002202398          | 60.85    | -115.95   | TMAX                    | 1893       | 1943     |
| HAY_RIVER2202402     | 60.83    | -115.78   |                         | 1893       | 2021     |
| USC00503162          | 61.10    | -146.45   | TMIN                    | 1900       | 1916     |
| USC00503655          | 62.18    | -159.77   | TMIN                    | 1892       | 1975     |
| GL000004360          | 65.60    | -37.63    | TMIN                    | 1894       | 2022     |
| NOE00105494          | 70.37    | 31.08     | TMIN                    | 1900       | 2022     |
| USC00506844          | 60.58    | -145.68   | TMIN                    | 1899       | 1908     |
| USC00507669          | 65.25    | -166.87   | TMIN                    | 1895       | 1995     |
| USC00507891          | 65.50    | -150.25   | TMIN                    | 1900       | 1933     |
| USC00508102          | 62.25    | -163.75   | TMIN                    | 1893       | 1898     |
| USC00508114          | 63.48    | -162.02   | TMIN                    | 1899       | 1933     |
| USC00509494          | 61.07    | -151.13   | TMIN                    | 1898       | 1970     |
| SW000010537          | 60.62    | 15.62     | TMIN                    | 1900       | 2022     |
| Malye Karmakuly20744 | 72.37    | 52.70     |                         | 1876       | 2022     |
| RSM00022003          | 69.93    | 31.98     | TAVG                    | 1894       | 2013     |
| RSM00022028          | 69.20    | 35.10     | TAVG                    | 1893       | 2022     |
| RSM00022140          | 68.15    | 39.82     | TAVG                    | 1895       | 2013     |
| RSM00022355          | 66.48    | 40.68     | TAVG                    | 1862       | 2013     |

| Station name        | Latitude | Longitude | Observation<br>Elements | Start Year | End Year |
|---------------------|----------|-----------|-------------------------|------------|----------|
| Zizgin22438         | 65.20    | 36.82     |                         | 1859       | 2022     |
| Kem'-Port22520      | 64.98    | 34.80     |                         | 1863       | 2022     |
| RSM00022550         | 64.50    | 40.73     | TAVG                    | 1813       | 2022     |
| Onega22641          | 63.90    | 38.12     |                         | 1887       | 2022     |
| RSM00022768         | 62.10    | 42.90     | TAVG                    | 1884       | 2022     |
| Sortavala22802      | 61.72    | 30.72     |                         | 1881       | 2022     |
| RSM00022837         | 61.02    | 36.45     | TAVG                    | 1878       | 2022     |
| RSM00022845         | 61.50    | 38.93     | TAVG                    | 1883       | 2022     |
| Vyborg22892         | 60.72    | 28.73     |                         | 1884       | 2022     |
| RSM00022907         | 60.08    | 26.97     | TAVG                    | 1865       | 1994     |
| RSM00023330         | 66.53    | 66.53     | TAVG                    | 1882       | 2022     |
| RSM00023405         | 65.43    | 52.27     | TAVG                    | 1889       | 2022     |
| Turuhansk23472      | 65.78    | 87.93     |                         | 1843       | 2022     |
| Tarko-Sale23552     | 64.92    | 77.82     |                         | 1843       | 2022     |
| Berezovo23631       | 63.93    | 65.05     |                         | 1834       | 2022     |
| RSM00023711         | 62.70    | 56.20     | TAVG                    | 1888       | 2022     |
| RSM00023804         | 61.67    | 50.87     | TAVG                    | 1817       | 2022     |
| RSM00023849         | 61.25    | 73.50     | TAVG                    | 1884       | 2022     |
| RSM00023914         | 60.40    | 56.52     | TAVG                    | 1888       | 2022     |
| RSM00023933         | 61.02    | 69.12     | TAVG                    | 1892       | 2022     |
| RSM00024266         | 67.57    | 133.40    | TAVG                    | 1869       | 2022     |
| RSM00024641         | 63.78    | 121.62    | TAVG                    | 1863       | 2022     |
| Suntar24738         | 62.15    | 117.65    |                         | 1900       | 2022     |
| RSM00024944         | 60.40    | 120.42    | TAVG                    | 1882       | 2022     |
| RSM00024959         | 62.02    | 129.72    | TAVG                    | 1834       | 2022     |
| RSM00024966         | 60.38    | 134.45    | TAVG                    | 1893       | 2022     |
| Srednekolym'sk25206 | 67.45    | 153.72    |                         | 1887       | 2022     |
| RSM00025551         | 64.68    | 170.42    | TAVG                    | 1894       | 2022     |
| RSM00025563         | 64.78    | 177.57    | TAVG                    | 1889       | 2022     |
| USW00026413         | 66.57    | -145.23   | TMIN                    | 1899       | 1990     |
| USW00026523         | 60.58    | -151.24   | TMIN                    | 1899       | 2022     |
| USW00026616         | 66.87    | -162.63   | TMIN                    | 1897       | 2022     |
| USW00026617         | 64.51    | -165.44   | TMIN                    | 1900       | 2022     |
| SWE00139430         | 60.65    | 17.17     | TMIN                    | 1882       | 1995     |
| SWE00139694         | 61.85    | 16.58     | TMIN                    | 1882       | 1966     |
| SWE00139720         | 62.02    | 14.19     | TMIN                    | 1882       | 2012     |

| Station name | Latitude | Longitude | Observation<br>Elements | Start Year | End Year |
|--------------|----------|-----------|-------------------------|------------|----------|
| SWE00140022  | 63.32    | 12.10     | TMIN                    | 1882       | 1964     |
| SWE00140132  | 63.68    | 16.95     | TMIN                    | 1899       | 2008     |
| SWE00140186  | 63.83    | 20.28     | TMIN                    | 1882       | 1979     |
| SWE00140492  | 65.32    | 21.49     | TMIN                    | 1882       | 2022     |
| SWE00140594  | 65.72    | 15.25     | TMIN                    | 1892       | 1972     |
| SWE00140746  | 66.63    | 19.64     | TMIN                    | 1882       | 2018     |
| SWE00140828  | 67.14    | 20.65     | TMIN                    | 1888       | 2022     |
| NOE00157204  | 69.32    | 16.12     | TMIN                    | 1876       | 1972     |
| NO000097250  | 69.47    | 25.50     | TMIN                    | 1900       | 2004     |

**Table S2.** The sitenames of tree ring used for summer Arctic temperature reconstructions. All tree ring data were obtained in International Tree Ring Data Bank. Postscript means e = earlywood width; i = earlywood density; l = latewood width; t = latewood density and x = maximum latewood density. The star means the site was used for reconstruction in all four detrending methods.

| Sitename  |           |           |           |           |           |           |
|-----------|-----------|-----------|-----------|-----------|-----------|-----------|
| ak006t*   | ak006x*   | ak010t*   | ak010x*   | ak035     | ak037     | ak039     |
| ak037     | ak039     | ak048     | ak051     | ak057*    | ak060     | ak062     |
| ak060     | ak062     | ak063     | ak072x*   | ak075x    | ak077x*   | ak078     |
| ak077x*   | ak078     | ak078x*   | ak087     | ak088     | ak089*    | ak110     |
| ak089*    | ak110     | ak115x    | ak116x*   | ak117x    | ak132x*   | ak148     |
| ak132x*   | ak148     | ak149     | ak151*    | cana319x  | cana321x  | cana340   |
| cana321x  | cana340   | cana360   | cana376   | cana4     | cana510   | cana512   |
| cana510   | cana512   | cana513   | cana514   | finl021*  | finl022*  | finl045   |
| finl022*  | finl045   | finl047   | finl052*  | finl055*  | finl055e* | finl055l* |
| finl055e* | finl055l* | finl060*  | finl061*  | finl062   | finl063   | finl066*  |
| finl063   | finl066*  | finl069x* | finl070*  | finl070*  | finl070x* | finl071x* |
| finl070x* | finl071x* | finl072*  | finl072*  | finl072x* | finl073x* | finl074*  |
| finl073x* | finl074*  | finl074*  | finl074x* | norw007   | norw008*  | norw009*  |
| norw008*  | norw009*  | norw010*  | norw011*  | norw011e* | norw011l* | norw012*  |
| norw011l* | norw012*  | norw012e* | norw012l  | russ016   | russ019   | russ021e  |
| russ019   | russ021e  | russ021l* | russ021t* | russ021w* | russ021x* | russ022e  |
| russ021x* | russ022e  | russ022t  | russ022x  | russ023e  | russ023t* | russ023w  |
| russ023t* | russ023w  | russ023x* | russ024e* | russ024e* | russ024t* | russ024w  |
| russ024t* | russ024w  | russ024x* | russ025e* | russ025e* | russ025l  | russ025t* |
| russ025l  | russ025t* | russ025w* | russ025x* | russ027e* | russ027e* | russ027i* |

| Sitename  |           |           |           |           |           |           |
|-----------|-----------|-----------|-----------|-----------|-----------|-----------|
| russ027e* | russ027i* | russ027i* | russ027t* | russ027w* | russ027x* | russ028e* |
| russ027x* | russ028e* | russ028e* | russ028i* | russ028t* | russ028w* | russ028x* |
| russ028w* | russ028x* | russ029e  | russ029i* | russ029i* | russ029l  | russ029l  |
| russ029l  | russ029l  | russ029t* | russ029w* | russ029x* | russ030e* | russ030e* |
| russ030e* | russ030e* | russ030l  | russ030t* | russ030w* | russ030x* | russ031e* |
| russ030x* | russ031e* | russ031e* | russ031l* | russ031t* | russ031w* | russ031x* |
| russ031w* | russ031x* | russ032e* | russ032e* | russ032l  | russ032t* | russ032w* |
| russ032t* | russ032w* | russ032x* | russ033e* | russ033e* | russ033t* | russ033w* |
| russ033t* | russ033w* | russ033x* | russ034e* | russ034e* | russ034t* | russ034w* |
| russ034t* | russ034w* | russ034x* | russ035e* | russ035e* | russ035i* | russ035i* |
| russ035i* | russ035i* | russ035l* | russ035n  | russ035t* | russ035w* | russ035x* |
| russ035w* | russ035x* | russ036e  | russ036t* | russ036w  | russ036x* | russ037i* |
| russ036x* | russ037i* | russ037t* | russ037x* | russ038e* | russ038t* | russ038w* |
| russ038t* | russ038w* | russ038x* | russ039t* | russ039x* | russ040e  | russ040t* |
| russ040e  | russ040t* | russ040w  | russ040x* | russ041e* | russ041e* | russ041l* |
| russ041e* | russ041l* | russ041l* | russ041t* | russ041w* | russ041x* | russ042t* |
| russ041x* | russ042t* | russ042x* | russ043e* | russ043t* | russ043w* | russ043x* |
| russ043w* | russ043x* | russ044i  | russ044l* | russ044n  | russ044t* | russ044x* |
| russ044t* | russ044x* | russ045l* | russ045l* | russ045t* | russ045w  | russ045x* |
| russ045w  | russ045x* | russ046e  | russ046t* | russ046w  | russ046x* | russ047t* |
| russ046x* | russ047t* | russ047x* | russ048e* | russ048l  | russ048t  | russ048w* |
| russ048t  | russ048w* | russ048x* | russ049t  | russ049x  | russ050t* | russ050x* |
| russ050t* | russ050x* | russ052e  | russ052t  | russ052w  | russ052x* | russ053t  |
| russ052x* | russ053t  | russ053x  | russ056e* | russ056e* | russ056t* | russ056w* |
| russ056t* | russ056w* | russ056x* | russ057x  | russ058e* | russ058e* | russ058t* |
| russ058e* | russ058t* | russ058w* | russ058x* | russ059t  | russ059x  | russ060t* |
| russ059x  | russ060t* | russ060x* | russ061i  | russ061t* | russ061x* | russ062e* |
| russ061x* | russ062e* | russ062e* | russ062t* | russ062w* | russ062x* | russ063t  |
| russ062x* | russ063t  | russ063x  | russ064e  | russ064i* | russ064i* | russ064l  |
| russ064i* | russ064l  | russ064t* | russ064w  | russ064x* | russ065e* | russ065e* |
| russ065e* | russ065e* | russ065l* | russ065t  | russ065w* | russ065x* | russ066e* |
| russ065x* | russ066e* | russ066e* | russ066w  | russ069t* | russ069x* | russ070e* |
| russ069x* | russ070e* | russ070l  | russ070t  | russ070w* | russ070x* | russ071e* |
| russ070x* | russ071e* | russ071t* | russ071w* | russ071x* | russ072t  | russ073e  |
| russ072t  | russ073e  | russ073t* | russ073w* | russ073x* | russ074t* | russ074x* |
| russ074t* | russ074x* | russ075i* | russ075n* | russ075t* | russ075x* | russ076i  |
| russ075x* | russ076i  | russ076l* | russ076n  | russ076t* | russ076x* | russ077t* |

| Sitename  |           |           |           |           |           |           |
|-----------|-----------|-----------|-----------|-----------|-----------|-----------|
| russ076x* | russ077t* | russ077x* | russ078e  | russ078t* | russ078w  | russ078x* |
| russ078w  | russ078x* | russ079t* | russ079x* | russ080e  | russ080i* | russ080l* |
| russ080i* | russ080l* | russ080t* | russ080w* | russ080x* | russ082i  | russ082l* |
| russ082i  | russ082l* | russ082t* | russ082w  | russ082x* | russ083t* | russ083x* |
| russ083t* | russ083x* | russ084i  | russ084t* | russ084x* | russ085e* | russ085e* |
| russ085e* | russ085e* | russ085w* | russ086l  | russ086w  | russ087e  | russ087l  |
| russ087e  | russ087l  | russ087t* | russ087w  | russ087x* | russ088t* | russ088x* |
| russ088t* | russ088x* | russ090e  | russ090l  | russ090w  | russ091t  | russ091x  |
| russ091t  | russ091x  | russ092i* | russ092l  | russ092t* | russ092x* | russ093e* |
| russ092x* | russ093e* | russ093t* | russ093w  | russ093x* | russ094e* | russ094l* |
| russ094e* | russ094l* | russ094t* | russ094w* | russ094x* | russ095i  | russ095t* |
| russ095i  | russ095t* | russ095x* | russ096t* | russ096x* | russ097t* | russ097x* |
| russ097t* | russ097x* | russ099e* | russ099e* | russ099i* | russ099l  | russ099t* |
| russ099l  | russ099t* | russ099w* | russ099x* | russ100e  | russ100i* | russ100l  |
| russ100i* | russ100l  | russ100t* | russ100w  | russ100x* | russ101e  | russ101t* |
| russ101e  | russ101t* | russ101w  | russ101x* | russ102t  | russ102x* | russ103e  |
| russ102x* | russ103e  | russ103l  | russ103t* | russ103w  | russ103x* | russ104t* |
| russ103x* | russ104t* | russ104x* | russ105e* | russ105w  | russ107e* | russ107t* |
| russ107e* | russ107t* | russ107w* | russ107x* | russ111e  | russ111i  | russ111l  |
| russ111i  | russ111l  | russ111t* | russ111w  | russ111x* | russ112e  | russ114i* |
| russ112e  | russ114i* | russ114t* | russ114x* | russ115i  | russ115t* | russ115x* |
| russ115t* | russ115x* | russ116t* | russ116x* | russ117i  | russ117t* | russ117x* |
| russ117t* | russ117x* | russ119e  | russ119i* | russ119l  | russ119t* | russ119w  |
| russ119t* | russ119w  | russ119x* | russ120i* | russ120i* | russ120t* | russ120w  |
| russ120t* | russ120w  | russ120x* | russ177e* | russ177t* | russ177w* | russ177x* |
| russ177w* | russ177x* | russ178e* | russ178l* | russ178t* | russ178w* | russ178x* |
| russ178w* | russ178x* | russ180i* | russ180l* | russ180t* | russ180w* | russ180x* |
| russ180w* | russ180x* | russ182*  | russ183   | russ184*  | russ185*  | russ187*  |
| russ185*  | russ187*  | russ188*  | russ189*  | russ191*  | russ192*  | russ194   |
| russ192*  | russ194   | russ195   | russ196   | russ197   | russ198   | russ199*  |
| russ198   | russ199*  | russ202*  | russ204   | russ205   | russ207   | russ208*  |
| russ207   | russ208*  | russ216*  | russ220   | russ221*  | russ223*  | russ237   |
| russ223*  | russ237   | russ237n* | russ237x* | russ238*  | russ238*  | russ238n* |
| russ238*  | russ238n* | russ238x* | russ239*  | russ239n* | russ239x* | swed018   |
| russ239x* | swed018   | swed306   | swed318   | swed327   | swed330   | swed330x* |
| swed330   | swed330x* | swed331*  | swed331x* | swed332   | swed332x* | swed333*  |
| swed332x* | swed333*  | swed333*  | swed333x* |           |           |           |

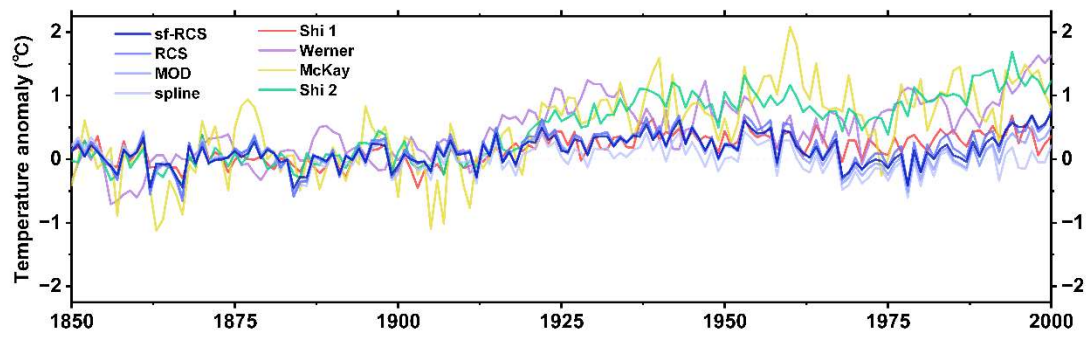

**Figure S1.** Arctic summer temperature anomalies relative to 1850-1900 for previous and our reconstructions.
